# Supplementary material for: Yeast-derived biosynthesis of silver/silver chloride nanoparticles and their antiproliferative activity against bacteria
Source: Royal Society of Chemistry journal article supplement (doi:10.1039/c5ra22727e), 2016-01-01

**Electronic Supplementary Material 1 – Culture medium color change and UV-Vis spectrum of yeast isolates other than SNPP1 (former TERM73) and SNPP2 (former TERM77).** Cell culture medium color change and UV-Vis analysis of yeast grown in the presence of 3.5 mM AgNO<sub>3</sub> for 7 days from TERM isolates (TERM 78, TERM 79, TERM82, TERM 83 and TERM 89) capable of producing Ag/AgCl-NPs.

**Electronic Supplementary Material 2 – Diameter of intracellular Ag/AgCl-NPs nanoaggregates.** Fig. 2S – Frequency of intracellular Ag/AgCl-NPs agglomerates of different sizes (diameters) based on focused ion beam/scanning electron microscopy (FIB/SEM) Z-stacks of yeast cells from *C. lusitaniae* SNPP2 cells.

**Electronic Supplementary Material 3 - Movie of focused ion beam scanning electron microscopy (FIB/SEM) series of the cell shown in Fig. 8A - E.** The FIB-SEM series originated a 3D model from an entire yeast, allowing the visualization of the spatial distribution of Ag/AgCl-NPs agglomerates in the inner part of the cell, as well as inside the cell wall and in the external medium. Green – outermost cell wall surface; yellow – innermost cell wall surface; silver – Ag/AgCl-NPs agglomerates.

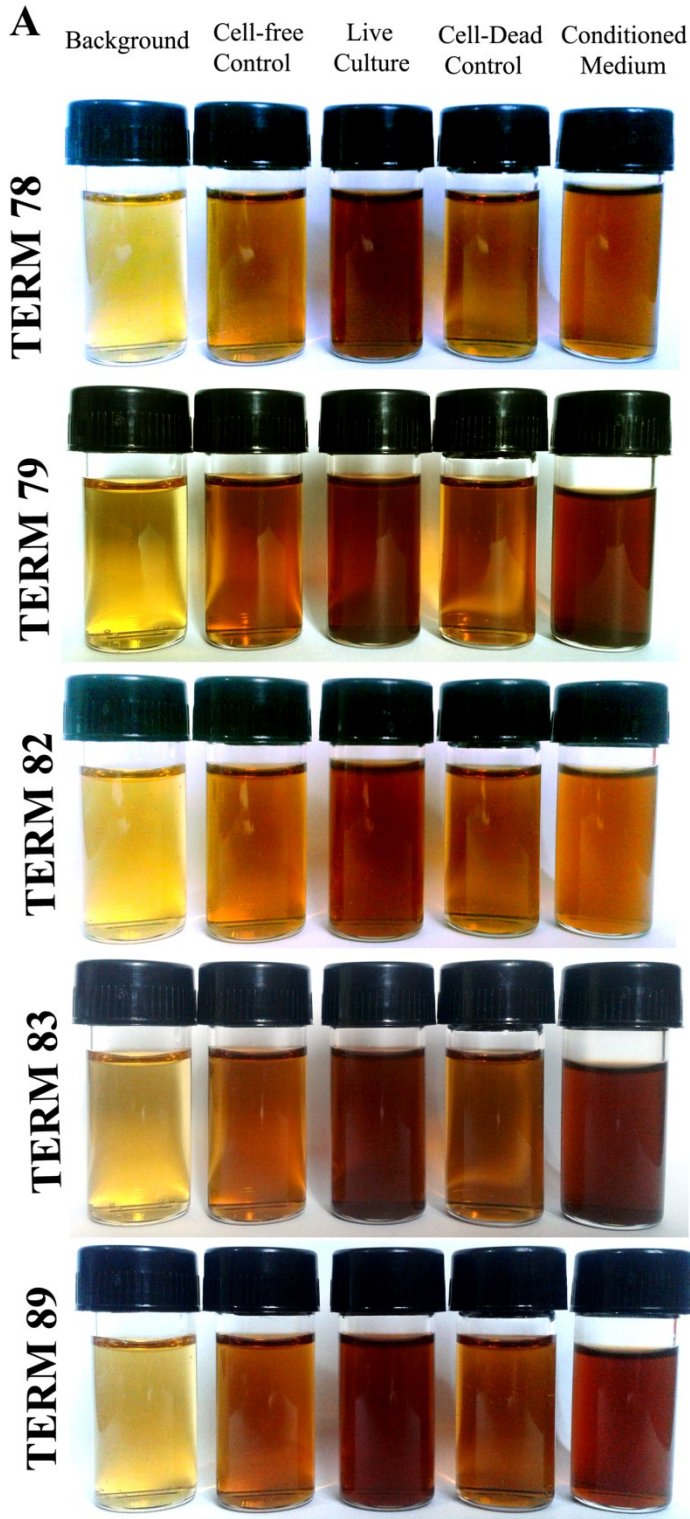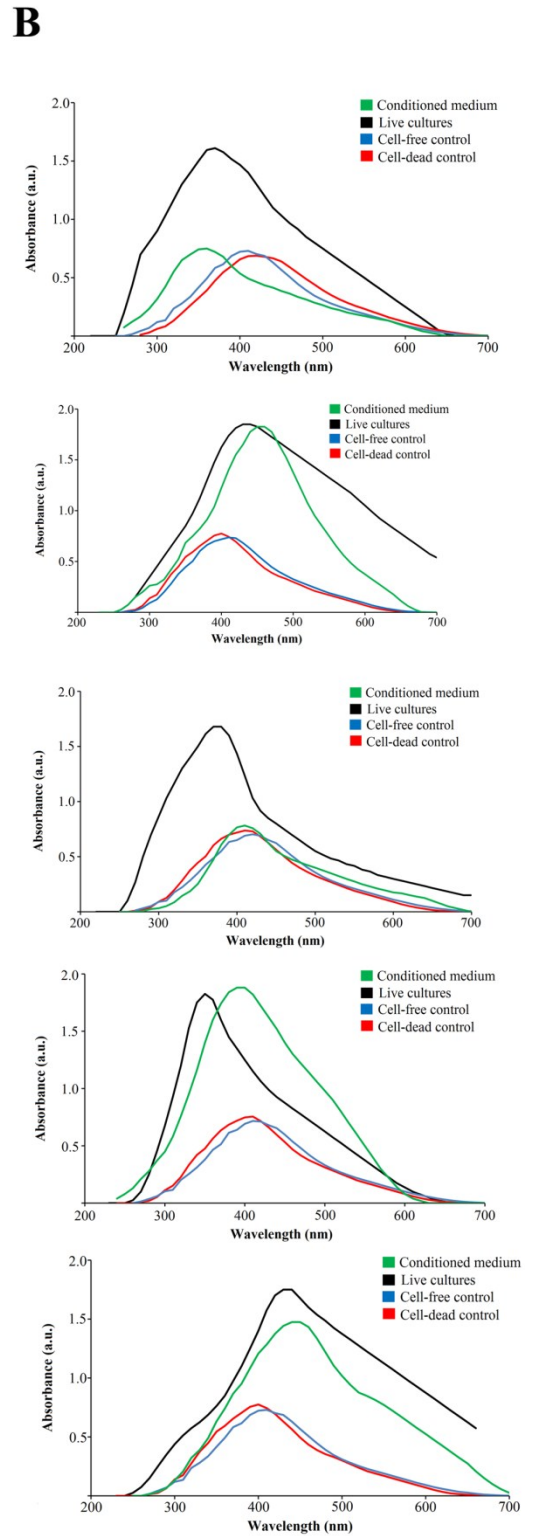

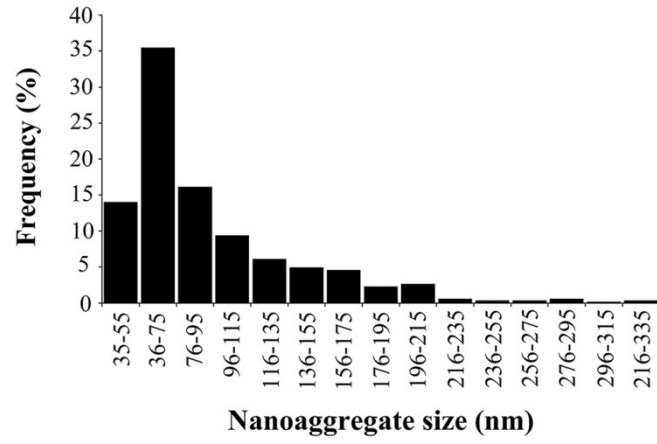

Supplement: c5ra22727e2.pdf [file c5ra22727e2.pdf]
